# Supplementary material for: The IGFBP3/TMEM219 pathway regulates beta cell homeostasis
Source: PubMed Central journal article supplement (PMC8813914; doi:10.1038/s41467-022-28360-2), 2022-02-03
Supplement: 41467_2022_28360_MOESM2_ESM.pdf [file 41467_2022_28360_MOESM2_ESM.pdf]

## **Description of Additional Supplementary Files**

File Name: Supplementary Data 1

Description: List of genes tested in Human Apoptosis PCR Arrays (PAHS-012Z, SABiosciences) and Human Insulin Signaling Pathway PCR Arrays (PAHS-030Z, SABiosciences).

File Name: Supplementary Data 2

Description: List of genes identified by RNAseq analysis. The table reports correspondence between numbers and names of genes detected by RNAseq analysis. Putative surface genes expressed with an RPKM > 2 are shown in Figure 1.
